# Supplementary material for: Species pool distributions along functional trade-offs shape plant productivity–diversity relationships
Source: PubMed Central journal article supplement (PMC5684142; doi:10.1038/s41598-017-15334-4), 2017-11-13

1

2 **Species pool distributions along functional trade-offs shape plant productivity–**  
3 **diversity relationships: supplementary materials**

4

L. Chalmandrier, C. Albouy and L. Pellissier

5

6

## Supplementary methods

### I Possible trait trade-offs in the theoretical model

Each species is characterized by four theoretical traits:  $f_i$ ,  $m_i$ ,  $l_i$  et  $c_i$ . We defined five possible trade-offs situations that can constrain species trait variability.

**a) No trade-off:** species traits are determined by independent uniform distributions that depend only on the range of each trait. We nonetheless establish the following constrain to keep species  $R_i^*$  between 0 and 1.

$$m_i < f_i \quad (\text{Equation S1})$$

**b) Mortality – Resource absorption trade-off:** species are placed on an axis that contrast fast-growing (high  $f_i$ ), stress-sensitive (high  $m_i$ ) to slow-growing species (low  $f_i$ ), stress-tolerant (low  $m_i$ ). We defined a power law relationship between  $f_i$  and  $m_i$  of exponent  $B = 0.5$  so that fast-growing, stress-sensitive species have a high  $R_i^*$  and are not able grow in resource-poor environments.

$$f_i = A \times m_i^{1/2} \iff R_i^* = A^{-2} \times f_i \iff R_i^* = A^{-1} \times m_i^{1/2} \quad (\text{Equation S2})$$

**c) Mortality - Resource absorption – Biomass tolerance trade-off:** species are placed on a axis that contrasts fast-growing (high  $f_i$ ), stress-sensitive (high  $m_i$ ) and that grow only in resource-rich environment (high  $R_i^*$ ) and slow-growing species (low  $f_i$ ), stress-tolerant (low  $m_i$ ), competition intolerant species (high  $l_i$ ) that can grow in resource-poor environment (low  $R_i^*$ ). This represents a single functional axis (all traits are perfectly correlated) and is analog to the “competition”- “stress-tolerant” side of the Grime triangle (Grime 1977). In addition, to the trade-off defined by Equation 3, we defined  $l_i$  as being linearly related to  $R_i^*$  and  $f_i$

$$l_i = C \times R_i^* + D \quad (\text{Equation S3})$$

And thus:

$$l_i = \frac{C}{A} \times m_i^{1/2} \quad (\text{Equation S4})$$

33 
$$l_i = \frac{C}{A^2} \times f_i + D \quad (\text{Equation S5})$$

34

35

36 **4) Mortality – Biomass tolerance trade-off:** species are placed on an axis that contrast stress-sensitive  
37 (high  $m_i$ ) and biomass-tolerant species (low  $l_i$ ) to stress-tolerant (low  $m_i$ ) but biomass-intolerant species  
38 (high  $l_i$ ). This trade-off was defined using only Equation 1 and Equation 5.

39

40 **5) Resource absorption – Biomass tolerance trade-off:** species are placed on an axis that contrast  
41 fast-growing (high  $f_i$ ) and biomass-tolerant species (low  $l_i$ ) to stress-tolerant (low  $m_i$ ) but biomass-  
42 intolerant species (high  $l_i$ ). This trade-off was defined using only Equation 1 and Equation 6.

43

44 Relationships among traits are defined by the parameters A, C, D, F et E. They control the range of  
45 numerical values that traits take relative to each other. A, C, E are strictly positive and D and F are  
46 positive. We calibrated these parameters values according to the range that could take  $f_i$ ,  $m_i$  and  $R_i^*$  (see  
47 Table S1)

48

## 49 II Database of species nutrient niche indicators for maps of European Flora

50 We combined four databases of niche indicators for European plant species: the Swiss flora database  
51 provided by Flora Indicativa<sup>1</sup>, the Ellenberg database for Central Europe flora<sup>2</sup>, the Italian flora niche  
52 indicators<sup>3</sup> and the British Islands flora niche indicators<sup>4</sup>. The indicator “N” characterized species niche  
53 position along local productivity gradient<sup>5,6</sup>. Possible overlap between such databases have been  
54 discussed in the literature<sup>5,7</sup> and establish that there is limits to the extent on which one can use the  
55 indicator scale of one geographic area into another. However, in the absence of an extensive  
56 community database to calibrate the relationship between databases, we used simple linear  
57 relationships to estimate the niche indicator value of species along the Swiss Landolt niche indicator  
58 scale from Flora Indicativa. This scale was preferred to the others because it contains less classes (five  
59 against nine for the other databases); values were available for a large number of species (6133) typical  
60 of areas well sampled in Europe by GBIF<sup>8</sup> (compared to Italy for instance, Figure S2).

61 We constructed a set of linear models predicting the Landolt value from every possible combinations of  
62 other available niche indicators. Overall, the models exhibited a good coefficient of determination  
63 (around 0.60) or moderate for the model for species with only an indicator value in the Italia flora  
64 database (0.38). We then used these models to predict the missing Landolt values for each species

65 according to their available niche indicators values (Table S2). Finally species predicted indicator  
66 values were rounded to the closest integer.

## References

1. Landolt, E. & Bäumler, B. *Flora indicativa: Ökologische Zeigerwerte und biologische Kennzeichen zur Flora der Schweiz und der Alpen*. (Haupt, 2010).
2. Ellenberg, H. *et al.* Zeigerwerte von pflanzen in Mitteleuropa. (1992).
3. Pignatti, S., Menegoni, P. & Pietrosanti, S. Biondificazione attraverso le piante vascolari. Valori di indicazione secondo Ellenberg (Zeigerwerte) per le specie della Flora d'Italia. *Braun-Blanquetia* **39**, 97 (2005).
4. Fitter, A. & Peat, H. The Ecological Flora Database. *J. Ecol.* **82**, 415–425 (1994).
5. Hill, M. O., Roy, D. B., Mountford, J. O. & Bunce, R. G. H. Extending Ellenberg's indicator values to a new area: an algorithmic approach. *J. Appl. Ecol.* **37**, 3–15 (2000).
6. Schaffers, A. P. & Sýkora, K. V. Reliability of Ellenberg indicator values for moisture, nitrogen and soil reaction: a comparison with field measurements. *J. Veg. Sci.* **11**, 225–244 (2000).
7. Godefroid, S. & Dana, E. D. Can Ellenberg's indicator values for Mediterranean plants be used outside their region of definition? *J. Biogeogr.* **34**, 62–68 (2007).
8. GBIF.org (29th February 2016) GBIF Occurrence Download <http://doi.org/10.15468/dl.ywhpmz>
9. R Core Team. *R: A Language and Environment for Statistical Computing*. (R Foundation for Statistical Computing, 2017).
10. Wessel, P. & Smith, W. H. F. *Global Self-consistent Hierarchical High-resolution Geography Database*. (2013).

69 **Table S1.** Model parameter values for the study of the impact of species pool structure on the  
70 productivity-diversity relationship.

| Name                                                             | Abbreviation | Feature     | Studied range                     |
|------------------------------------------------------------------|--------------|-------------|-----------------------------------|
| <b>Species pool structure parameters</b>                         |              |             |                                   |
| Number of species                                                | N            |             | [50, 200]                         |
| Resource uptake rate                                             | $f_i$        | Average     | [1.1, 2.1]                        |
|                                                                  |              | Range width | [0.4, 2.0]                        |
| Effect of neighbouring biomass                                   | $l_i$        | Average     | [1.6, 2.5]                        |
|                                                                  |              | Range width | [0.4, 3.0]                        |
| Mortality rate                                                   | $m_i$        |             | Deduced from the other parameters |
| Intraspecific competition rate                                   | $c_i$        | Average     | 0.6                               |
|                                                                  |              | Range width | 0                                 |
| Shape of the trade-off between mortality and resource absorption | B            |             | 0.5                               |
| Tilman's $R^*$                                                   | $R_i^*$      |             | [0, 1]                            |
| <b>Soil resource parameters</b>                                  |              |             |                                   |
| Resource renewing rate                                           | a            |             | {0.05, 0.55, 1.05, ..., 2.55}     |
| Maximum resource capacity                                        | S            |             | {0.1, 0.6, 1.1, ..., 3.1}         |

72 **Table S2.** Characteristics of the linear models used to bring all Landolt indicator values on the same  
 73 scale. The Ellenberg (CE), Pignatti (IT) and Fitter (UK) values records preferences for soil resources on  
 74 a scale from 1 to 10, while Landolt value (CH) on a scale from 1 to 5. We used species with several  
 75 classifications to bring N values on the same 1 to 5 scale.

| Available traits | Number of species used to fit the model (species in common with the Landolt database) | R <sup>2</sup> of the linear model | Number of predicted species indicator values |
|------------------|---------------------------------------------------------------------------------------|------------------------------------|----------------------------------------------|
| IT, UK, CE       | 1057                                                                                  | 0.66                               | 67                                           |
| IT, CE           | 2005                                                                                  | 0.58                               | 73                                           |
| EL, UK           | 1133                                                                                  | 0.65                               | 18                                           |
| IT, UK           | 1255                                                                                  | 0.63                               | 153                                          |
| IT               | 3659                                                                                  | 0.38                               | 1950                                         |
| UK               | 1415                                                                                  | 0.61                               | 135                                          |
| CE               | 2175                                                                                  | 0.57                               | 41                                           |

77 **Figure S1.** Map of the main biogeographical zones of Europe used to modelled plant species  
78 distributions (source: European Environment agency, [http://www.eea.europa.eu/data-and-  
80 maps/figures/biogeographical-regions-in-europe-1](http://www.eea.europa.eu/data-and-<br/>79 maps/figures/biogeographical-regions-in-europe-1)). The map was generated using R3.4.2  
(<https://cran.r-project.org>)<sup>9</sup>.

81

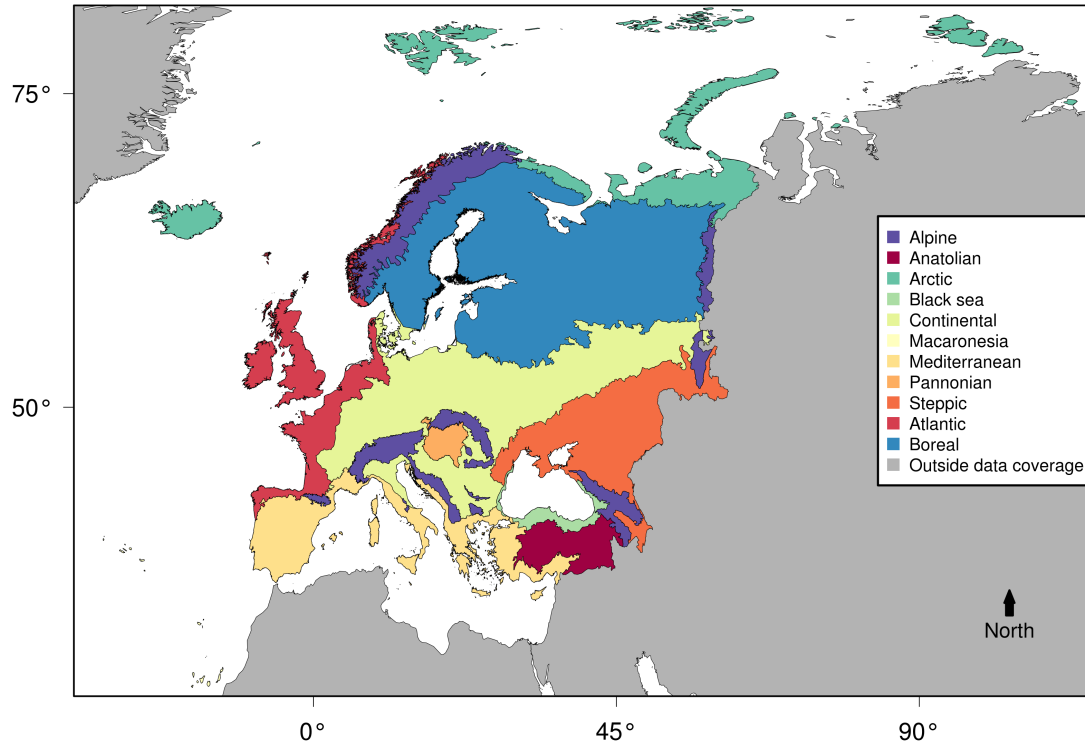



82 **Figure S2.** Percent of species across the European species pools modelled with our methodology that  
83 match the Atlas Flora Europae for each 1° cell across Europe. The comparison was done for the  
84 families listed in volume 1-13 of Atlas Flora Europae ([https://www.luomus.fi/en/list-families-mapped-](https://www.luomus.fi/en/list-families-mapped-atlas-florae-europaeae)  
85 [atlas-florae-europaeae](https://www.luomus.fi/en/list-families-mapped-atlas-florae-europaeae)). The map was generated using R3.4.2 (<https://cran.r-project.org>)<sup>9</sup>. The coastline  
86 data was downloaded from the US National Centers for Environmental Information<sup>10</sup>.

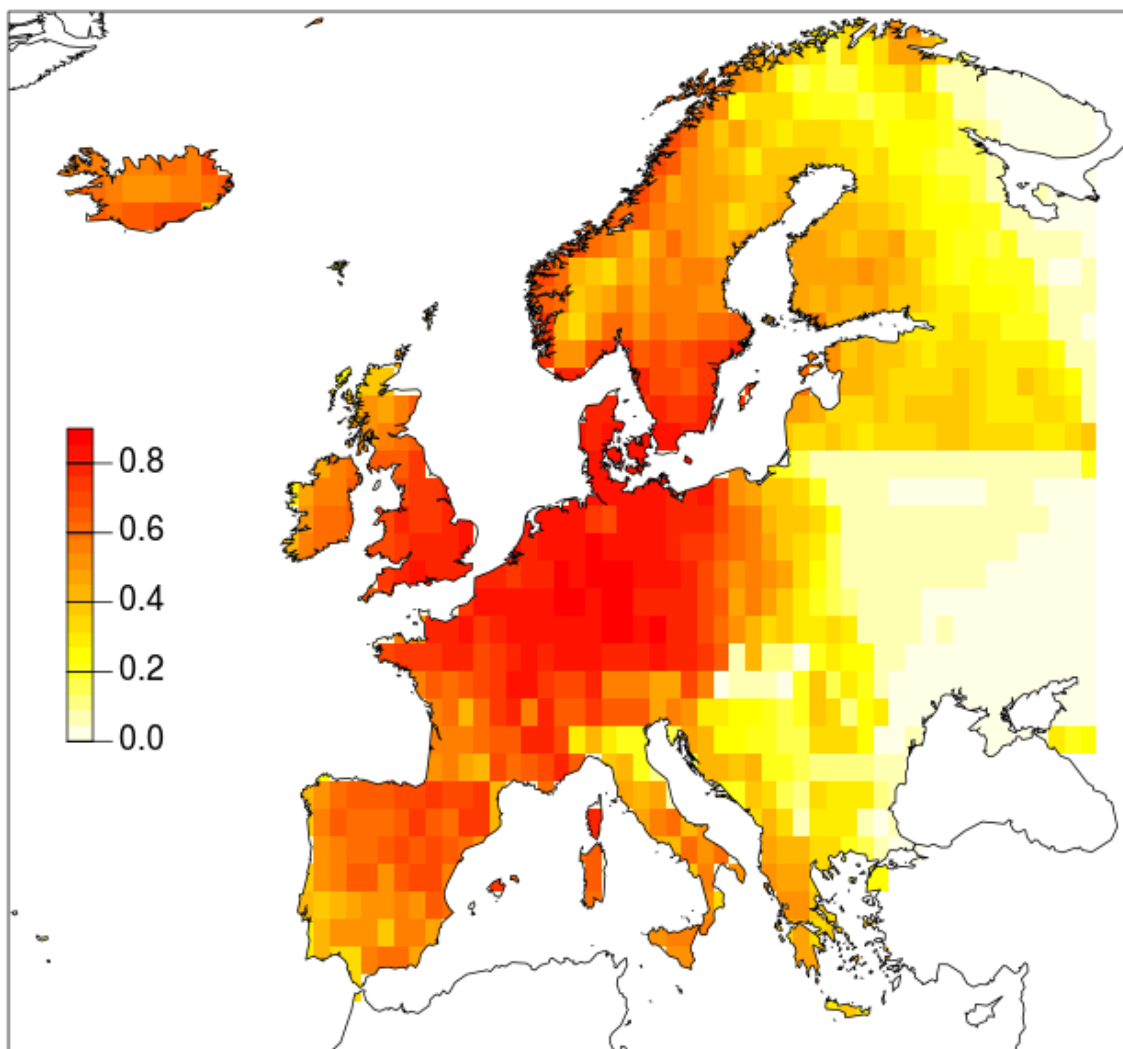

Supplement: 41598_2017_15334_MOESM1_ESM.pdf [file 41598_2017_15334_MOESM1_ESM.pdf]
